# Supplementary material for: Persister Cell Formation and Elevated lsrA and lsrC Gene Expression upon Hydrogen Peroxide Exposure in a Periodontal Pathogen Aggregatibacter actinomycetemcomitans
Source: MDPI journal article supplement (doi:10.3390/microorganisms11061402), 2023-05-26
Supplement: s1 [file s1]

## SUPPORTING INFORMATION

### **Persister cell formation and elevated *lsrA* and *lsrC* gene expression upon hydrogen peroxide exposure in a periodontal pathogen *Aggregatibacter actinomycetemcomitans***

**Yohei Nakamura<sup>1,2</sup>, Koji Watanabe<sup>2</sup>, Yoshie Yoshioka<sup>1</sup>, Wataru Ariyoshi<sup>1</sup>, Ryota Yamasaki<sup>1, 3\*</sup>**

<sup>1</sup>Division of Infections and Molecular Biology, Department of Health Promotion, Kyushu Dental University, Kitakyushu, Fukuoka 803-8580 Japan

<sup>2</sup> Division of Developmental Stomatognathic Function Science, Department of Health Promotion, Kyushu Dental University, Kitakyushu, Fukuoka 803-8580 Japan

<sup>3</sup> Collaborative Research Centre for Green Materials on Environmental Technology, Kyushu Institute of Technology, 1-1 Sensui-chou, Tobata-ku, Kitakyushu, Fukuoka 804-8550, Japan

\*For correspondence. E-mail [r18yamasaki@fa.kyu-dent.ac.jp](mailto:r18yamasaki@fa.kyu-dent.ac.jp)

Tel. (+)81 93-285-3051

**Keywords:** *Aggregatibacter actinomycetemcomitans*; hydrogen peroxide; persister; periodontitis

**Table S1.** Number of cell divisions of the non-treated exponential *Aggregatibacter actinomycetemcomitans* cells and hydrogen peroxide-treated persister cells every half hour. % indicates the percentage of bacteria that dividing at that time.

| Time (h)     | Exponential cells<br>(Total=101 cells) |       | Persister cells<br>(Total=4,291 cells) |      |
|--------------|----------------------------------------|-------|----------------------------------------|------|
|              | Division                               | %     | Resuscitation<br>(division)            | %    |
| <b>0</b>     | 0                                      | 0     | 0                                      | 0    |
| <b>1.5</b>   | 31                                     | 30.69 | 5                                      | 0.12 |
| <b>2</b>     | 61                                     | 60.40 | 2                                      | 0.05 |
| <b>2.5</b>   | 5                                      | 4.95  | 4                                      | 0.09 |
| <b>3</b>     | 1                                      | 0.99  | 5                                      | 0.12 |
| <b>3.5</b>   | 0                                      | 0     | 8                                      | 0.19 |
| <b>4</b>     | 0                                      | 0     | 7                                      | 0.16 |
| <b>4.5</b>   | 0                                      | 0     | 6                                      | 0.14 |
| <b>5</b>     | 0                                      | 0     | 8                                      | 0.19 |
| <b>5.5</b>   | 0                                      | 0     | 3                                      | 0.07 |
| <b>6</b>     | 0                                      | 0     | 1                                      | 0.02 |
| <b>6.5</b>   | 0                                      | 0     | 0                                      | 0    |
| <b>Total</b> | 98                                     | 97.03 | 49                                     | 1.14 |

(a) 0.06% H<sub>2</sub>O<sub>2</sub> in *A. actinomycetemcomitans* culture

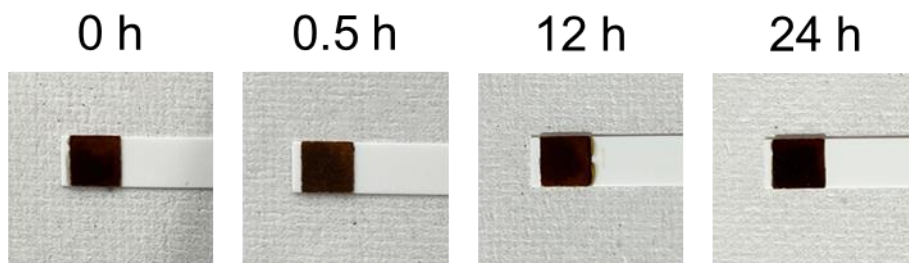

(b) Each H<sub>2</sub>O<sub>2</sub> concentration in water

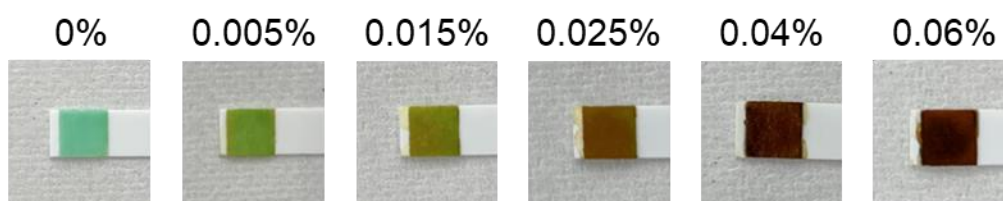

**Figure S1.** Hydrogen peroxide concentration test using test paper (Serim Research). (a) Testing the hydrogen peroxide concentration in the experiment in Figure 2b. No decrease in hydrogen peroxide concentration during 0–24 h in *A. actinomycetemcomitans* culture during hydrogen peroxide treatment. (b) Testing of hydrogen peroxide solutions added to water at various concentrations (test paper analysis).

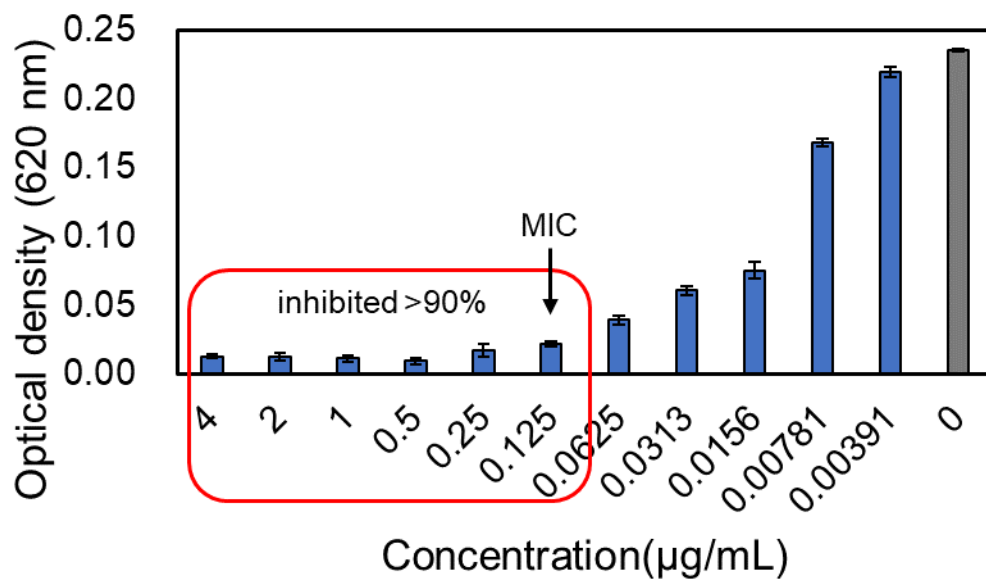

**Figure S2.** Growth inhibitory effects of mitomycin C (MMC) against *A. actinomycetemcomitans*. MMC value above 0.125 µg/mL inhibited more than 90 % of the bacterium. Hence, the MIC was defined at 0.125 µg/mL. This experiment was performed using three independent bacterial cultures.

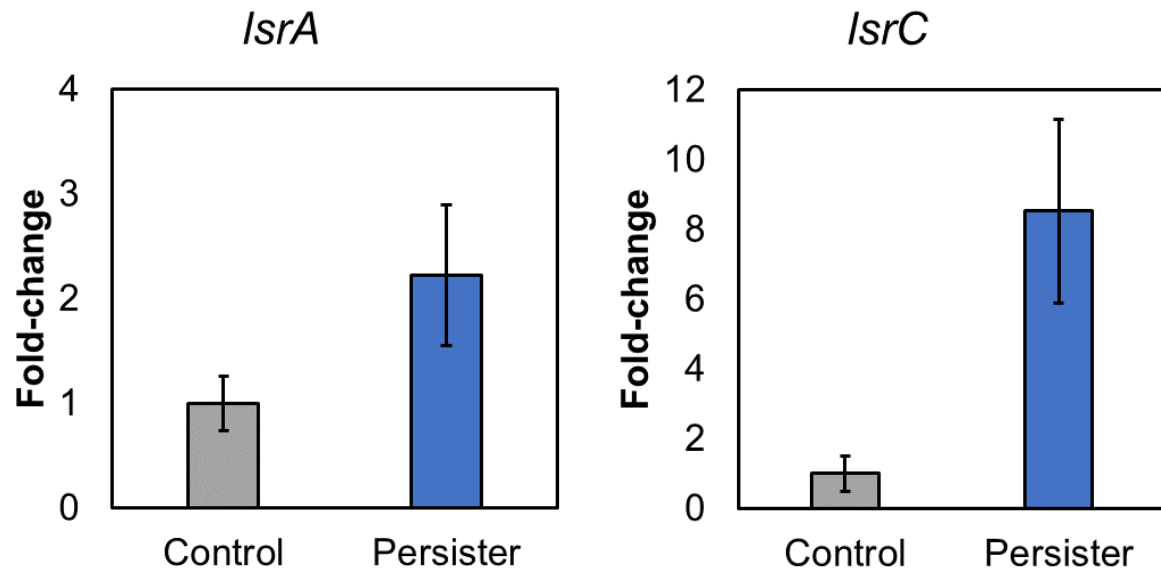

**Figure S3.** Quantification of *lsrA* and *lsrC* genes using real-time reverse transcription-polymerase chain reaction RT-PCR. Error bars indicate standard deviations of three independent samples.
